# Supplementary material for: Circadian misalignment alters insulin sensitivity during the light phase and shifts glucose tolerance rhythms in female mice
Source: PubMed Central journal article supplement (PMC6919582; doi:10.1371/journal.pone.0225813), 2019-12-18
Supplement: pone.0225813.s002.pdf [file pone.0225813.s002.pdf]

| 7-day shift work cycles                                                                                             | Experimental period | Animal                   | Glucose tolerance/insulin sensitivity |               |                               | Study                          |
|---------------------------------------------------------------------------------------------------------------------|---------------------|--------------------------|---------------------------------------|---------------|-------------------------------|--------------------------------|
|                                                                                                                     |                     |                          | Test method                           | Testing time  | Outcome                       |                                |
| 12 h advance on day 1, normal phase on day 2-7                                                                      | 3 weeks             | C57BL/6 male mice        | OGTT                                  | ZT9 on day 2  | glucose tolerance ↓           | Figueiro et al. 2017 [14]      |
| 12 h advance on day 1-3, normal phase on day 4-7                                                                    | 3 weeks             | C57BL/6 male mice        | OGTT                                  | ZT9 on day 4  | glucose tolerance ↓           | Figueiro et al. 2017 [14]      |
| 10 h delay on day 1-4, normal phase on day 5-7                                                                      | 12 weeks            | Sudanian grass male rats | OGTT                                  | ZT2; day NR   | glucose tolerance ↓           | Grosbellet et al. 2015 [15]    |
| 8 h advance on day 1-3, normal phase on day 4-6 (6-day cycles)                                                      | 8 weeks             | C57BL/6 female/male mice | OGTT                                  | NR            | glucose tolerance ↓           | Thaiss et al. 2014 [16]        |
| 10 h advance on day 1-4, normal phase on day 5-7                                                                    | 20 weeks            | Long-Evans male rats     | OGTT                                  | ZT2 on day 7  | glucose tolerance unchanged   | Bartol-Munier et al. 2006 [17] |
| 6 h advance on day 1-3, 12 h advance on day 4-6, 18 h advance on day 7-9, normal phase on day 10-12 (12-day cycles) | 10 weeks            | Sprague Dawley male rats | hyperinsulinemic-euglycemic clamp     | ZT2 on day 10 | insulin sensitivity unchanged | Gale et al. 2011 [18]          |

14. Figueiro MG, Radetsky L, Plitnick B, Rea MS. Glucose tolerance in mice exposed to light-dark stimulus patterns mirroring dayshift and rotating shift schedules. *Sci Rep.* 2017;7:40661. Epub 2017/01/13. doi: 10.1038/srep40661. PubMed PMID: 28079162; PubMed Central PMCID: PMC5227691.
15. Grosbellet E, Zahn S, Arrive M, Dumont S, Gourmelen S, Pevet P, et al. Circadian desynchronization triggers premature cellular aging in a diurnal rodent. *FASEB J.* 2015;29(12):4794-803. Epub 2015/08/12. doi: 10.1096/fj.14-266817. PubMed PMID: 26260033.
16. Thaïss CA, Zeevi D, Levy M, Zilberman-Schapira G, Suez J, Tengeler AC, et al. Transkingdom control of microbiota diurnal oscillations promotes metabolic homeostasis. *Cell.* 2014;159(3):514-29. Epub 2014/11/25. doi: 10.1016/j.cell.2014.09.048. PubMed PMID: 25417104.
17. Bartol-Munier I, Gourmelen S, Pevet P, Challet E. Combined effects of high-fat feeding and circadian desynchronization. *Int J Obes (Lond).* 2006;30(1):60-7. Epub 2005/09/15. doi: 10.1038/sj.ijo.0803048. PubMed PMID: 16158090.
18. Gale JE, Cox HI, Qian J, Block GD, Colwell CS, Matveyenko AV. Disruption of circadian rhythms accelerates development of diabetes through pancreatic beta-cell loss and dysfunction. *J Biol Rhythms.* 2011;26(5):423-33. Epub 2011/09/17. doi: 10.1177/0748730411416341. PubMed PMID: 21921296; PubMed Central PMCID: PMC3359760.
