# Supplementary material for: Circadian misalignment alters insulin sensitivity during the light phase and shifts glucose tolerance rhythms in female mice
Source: PubMed Central journal article supplement (PMC6919582; doi:10.1371/journal.pone.0225813), 2019-12-18
Supplement: pone.0225813.s003.pdf [file pone.0225813.s003.pdf]

| <b>Gene</b>                     | <b>Forward primer (5'-3')</b> | <b>Reverse primer (5'-3')</b> |
|---------------------------------|-------------------------------|-------------------------------|
| <i>G6pase</i>                   | GCATTTGCCAGGAAGAGAAAG         | AACTGAAGCCGGTTAGACATAG        |
| <i>PEPCK</i>                    | TTTGTAGGAGCAGCCATGAG          | CCGAAGTTGTAGCCGAAGAA          |
| <i>Glut2</i>                    | CTTACAGTCACACCAGCATACA        | AGACAGAGACCAGAGCATAGT         |
| <i>Pygl</i>                     | GACATCTTCCTCCGGGAAATAG        | CATGGAGGATGGGTTGATCTT         |
| <i>Gys2</i>                     | GCTGTGGATGCGATGAATAAAC        | CTGAGGAGCTGATGTCAAAGAG        |
| <i>Gck</i>                      | CATCAGGAGGCCAGTGTAAG          | TCCCAGGTCTAAGGAGAGAAAG        |
| <i>Foxo1</i>                    | GAGCCTCCTTCAAACAGAGTAG        | GCAATGGTAAGAAATGGCAGAG        |
| <i>Ppara</i>                    | AACCTGAGGAAGCCGTTCTGTGACAT    | GACCAGCTGCCGAAGGTCCACCAT      |
| <i>Ppary</i>                    | CACAATGCCATCAGTTTTGG          | GCTGGTCGATATCACTGGAGATC       |
| <i>PGC-1a</i>                   | CTAGCCATGGATGGCCTATTT         | GTCTCGACACGGAGAGTTAAAG        |
| <i>Clock</i>                    | GAGTGTTCCAGTCCCTTGATGAG       | GCTGTGTCCCTATGACCATTT         |
| <i>Bmal1</i>                    | CAACCCATACACAGAAGCAAAC        | CATCTGCTGCCCTGAGAATTA         |
| <i>Cry1</i>                     | CTCAGTCCTTATCTCCGCTTTG        | CCACAGGAGTTGCCATAAA           |
| <i>Cry2</i>                     | AGGTGTGGTGTGCCATTT            | GCAGCCCTGGTAAGAAGATAC         |
| <i>Per1</i>                     | CCTGGAGGAATTGGAGCATATC        | CCTGCCTGCTCCGAAATATAG         |
| <i>Per2</i>                     | CAACAACCCACACACCAAAC          | CTCGATCAGATCCTGAGGTAGA        |
| <i>Rev-erba</i>                 | GGGCACAAGCAACATTACCA          | CACGTCCCCACACACCTTAC          |
| <i>RORa</i>                     | CACGAGTGAGAGACAAGCATAA        | CTTTGATGCCAGACCAGTATCT        |
| <i><math>\beta</math>-actin</i> | GAGGTATCCTGACCCTGAAGTA        | CACACGCAGCTCATTGTAGA          |
