# Supplementary material for: Circadian misalignment alters insulin sensitivity during the light phase and shifts glucose tolerance rhythms in female mice
Source: PubMed Central journal article supplement (PMC6919582; doi:10.1371/journal.pone.0225813), 2019-12-18
Supplement: pone.0225813.s004.pdf [file pone.0225813.s004.pdf]

| Variables                           | Control    | Shift work |
|-------------------------------------|------------|------------|
| Body weight (g)                     | 19.44±0.77 | 19.58±1.20 |
| Body weight gain (%)                | 8.74±3.28  | 8.34±4.53  |
| Liver weight/ body weight (%)       | 4.31±0.31  | 4.29±0.25  |
| Gonadal WAT weight/ body weight (%) | 0.90±0.25  | 0.89±0.30  |
| Pancreas weight/ body weight (%)    | 1.74±0.28  | 1.68±0.35  |
