# Supplementary material for: Circadian misalignment alters insulin sensitivity during the light phase and shifts glucose tolerance rhythms in female mice
Source: PubMed Central journal article supplement (PMC6919582; doi:10.1371/journal.pone.0225813), 2019-12-18
Supplement: pone.0225813.s005.pdf [file pone.0225813.s005.pdf]

|      | Group      | <i>P</i> value of rhythmicity | Mesor, A  | Amplitude, B | Phase (hour), C |
|------|------------|-------------------------------|-----------|--------------|-----------------|
| Day1 | Control    | <0.0001                       | 0.69±0.04 | 0.57±0.05    | 17.24±0.34      |
|      | Shift work | <0.0001                       | 0.72±0.05 | 0.66±0.07    | 14.64±0.38      |
| Day2 | Control    | <0.0001                       | 0.72±0.03 | 0.60±0.04    | 17.69±0.25      |
|      | Shift work | <0.0001                       | 0.85±0.04 | 0.45±0.05    | 12.84±0.45      |
| Day3 | Control    | <0.0001                       | 0.78±0.03 | 0.60±0.04    | 16.75±0.28      |
|      | Shift work | <0.0001                       | 0.81±0.04 | 0.50±0.06    | 11.48±0.47      |
| Day4 | Control    | <0.0001                       | 0.80±0.04 | 0.71±0.06    | 16.07±0.31      |
|      | Shift work | <0.0001                       | 0.79±0.04 | 0.53±0.05    | 11.58±0.39      |
| Day5 | Control    | <0.0001                       | 0.89±0.05 | 0.79±0.07    | 15.59±0.31      |
|      | Shift work | <0.0001                       | 0.84±0.04 | 0.67±0.06    | 13.08±0.34      |
| Day6 | Control    | <0.0001                       | 0.90±0.05 | 0.87±0.07    | 15.84±0.31      |
|      | Shift work | <0.0001                       | 0.80±0.04 | 0.58±0.05    | 13.98±0.32      |
| Day7 | Control    | <0.0001                       | 0.85±0.05 | 0.82±0.07    | 15.43±0.32      |
|      | Shift work | <0.0001                       | 0.90±0.03 | 0.56±0.05    | 14.92±0.32      |
