# Supplementary material for: Circadian misalignment alters insulin sensitivity during the light phase and shifts glucose tolerance rhythms in female mice
Source: PubMed Central journal article supplement (PMC6919582; doi:10.1371/journal.pone.0225813), 2019-12-18
Supplement: pone.0225813.s006.pdf [file pone.0225813.s006.pdf]

|                                     | Control       | Shift work    |
|-------------------------------------|---------------|---------------|
| 24-hour total movement distance (m) | 505.23±132.13 | 499.61±101.58 |
| Light-phase movement distance (m)   | 95.79±40.60   | 94.35±81.32   |
| Dark-phase movement distance (m)    | 409.44±114.62 | 405.26±150.91 |
