# Supplementary material for: Circadian misalignment alters insulin sensitivity during the light phase and shifts glucose tolerance rhythms in female mice
Source: PubMed Central journal article supplement (PMC6919582; doi:10.1371/journal.pone.0225813), 2019-12-18
Supplement: pone.0225813.s007.pdf [file pone.0225813.s007.pdf]

| Gene            | Time           |                | Treatment      |                | Time*treatment |                |
|-----------------|----------------|----------------|----------------|----------------|----------------|----------------|
|                 | <i>F</i> value | <i>P</i> value | <i>F</i> value | <i>P</i> value | <i>F</i> value | <i>P</i> value |
| <i>G6pase</i>   | 17.895         | <0.001*        | 0.209          | 0.650          | 0.640          | 0.670          |
| <i>PEPCK</i>    | 16.237         | <0.001*        | 0.348          | 0.558          | 2.029          | 0.091          |
| <i>Glut2</i>    | 33.814         | <0.001*        | 1.329          | 0.255          | 1.640          | 0.168          |
| <i>Pygl</i>     | 21.820         | <0.001*        | 1.316          | 0.257          | 1.340          | 0.264          |
| <i>Gys2</i>     | 33.824         | <0.001*        | 0.353          | 0.555          | 2.389          | 0.052          |
| <i>Gck</i>      | 13.738         | <0.001*        | 0.414          | 0.523          | 1.968          | 0.101          |
| <i>Foxo1</i>    | 18.336         | <0.001*        | 0.073          | 0.788          | 2.706          | 0.031*         |
| <i>Ppara</i>    | 52.329         | <0.001*        | 0.422          | 0.519          | 3.207          | 0.014*         |
| <i>Pparγ</i>    | 6.391          | <0.001*        | 0.176          | 0.676          | 3.164          | 0.015*         |
| <i>PGC-1α</i>   | 11.262         | <0.001*        | 0.142          | 0.708          | 1.749          | 0.142          |
| <i>Clock</i>    | 62.720         | <0.001*        | 0.171          | 0.681          | 5.802          | <0.001*        |
| <i>Bmal1</i>    | 104.541        | <0.001*        | 0.823          | 0.369          | 3.231          | 0.014*         |
| <i>Cry1</i>     | 64.237         | <0.001*        | 3.957          | 0.052          | 4.987          | 0.001*         |
| <i>Cry2</i>     | 31.305         | <0.001*        | 0.242          | 0.625          | 2.297          | 0.060          |
| <i>Per1</i>     | 15.330         | <0.001*        | 0.114          | 0.737          | 1.635          | 0.169          |
| <i>Per2</i>     | 67.879         | <0.001*        | 0.311          | 0.580          | 6.687          | <0.001*        |
| <i>Rev-erba</i> | 67.679         | <0.001*        | 2.527          | 0.118          | 3.883          | 0.005*         |
| <i>RORα</i>     | 26.691         | <0.001*        | 0.397          | 0.532          | 3.858          | 0.005*         |
